# Supplementary material for: Characterization of Retinal Functionality at Different Eccentricities in a Diurnal Rodent
Source: PubMed Central journal article supplement (PMC6287453; doi:10.3389/fncel.2018.00444), 2018-12-03

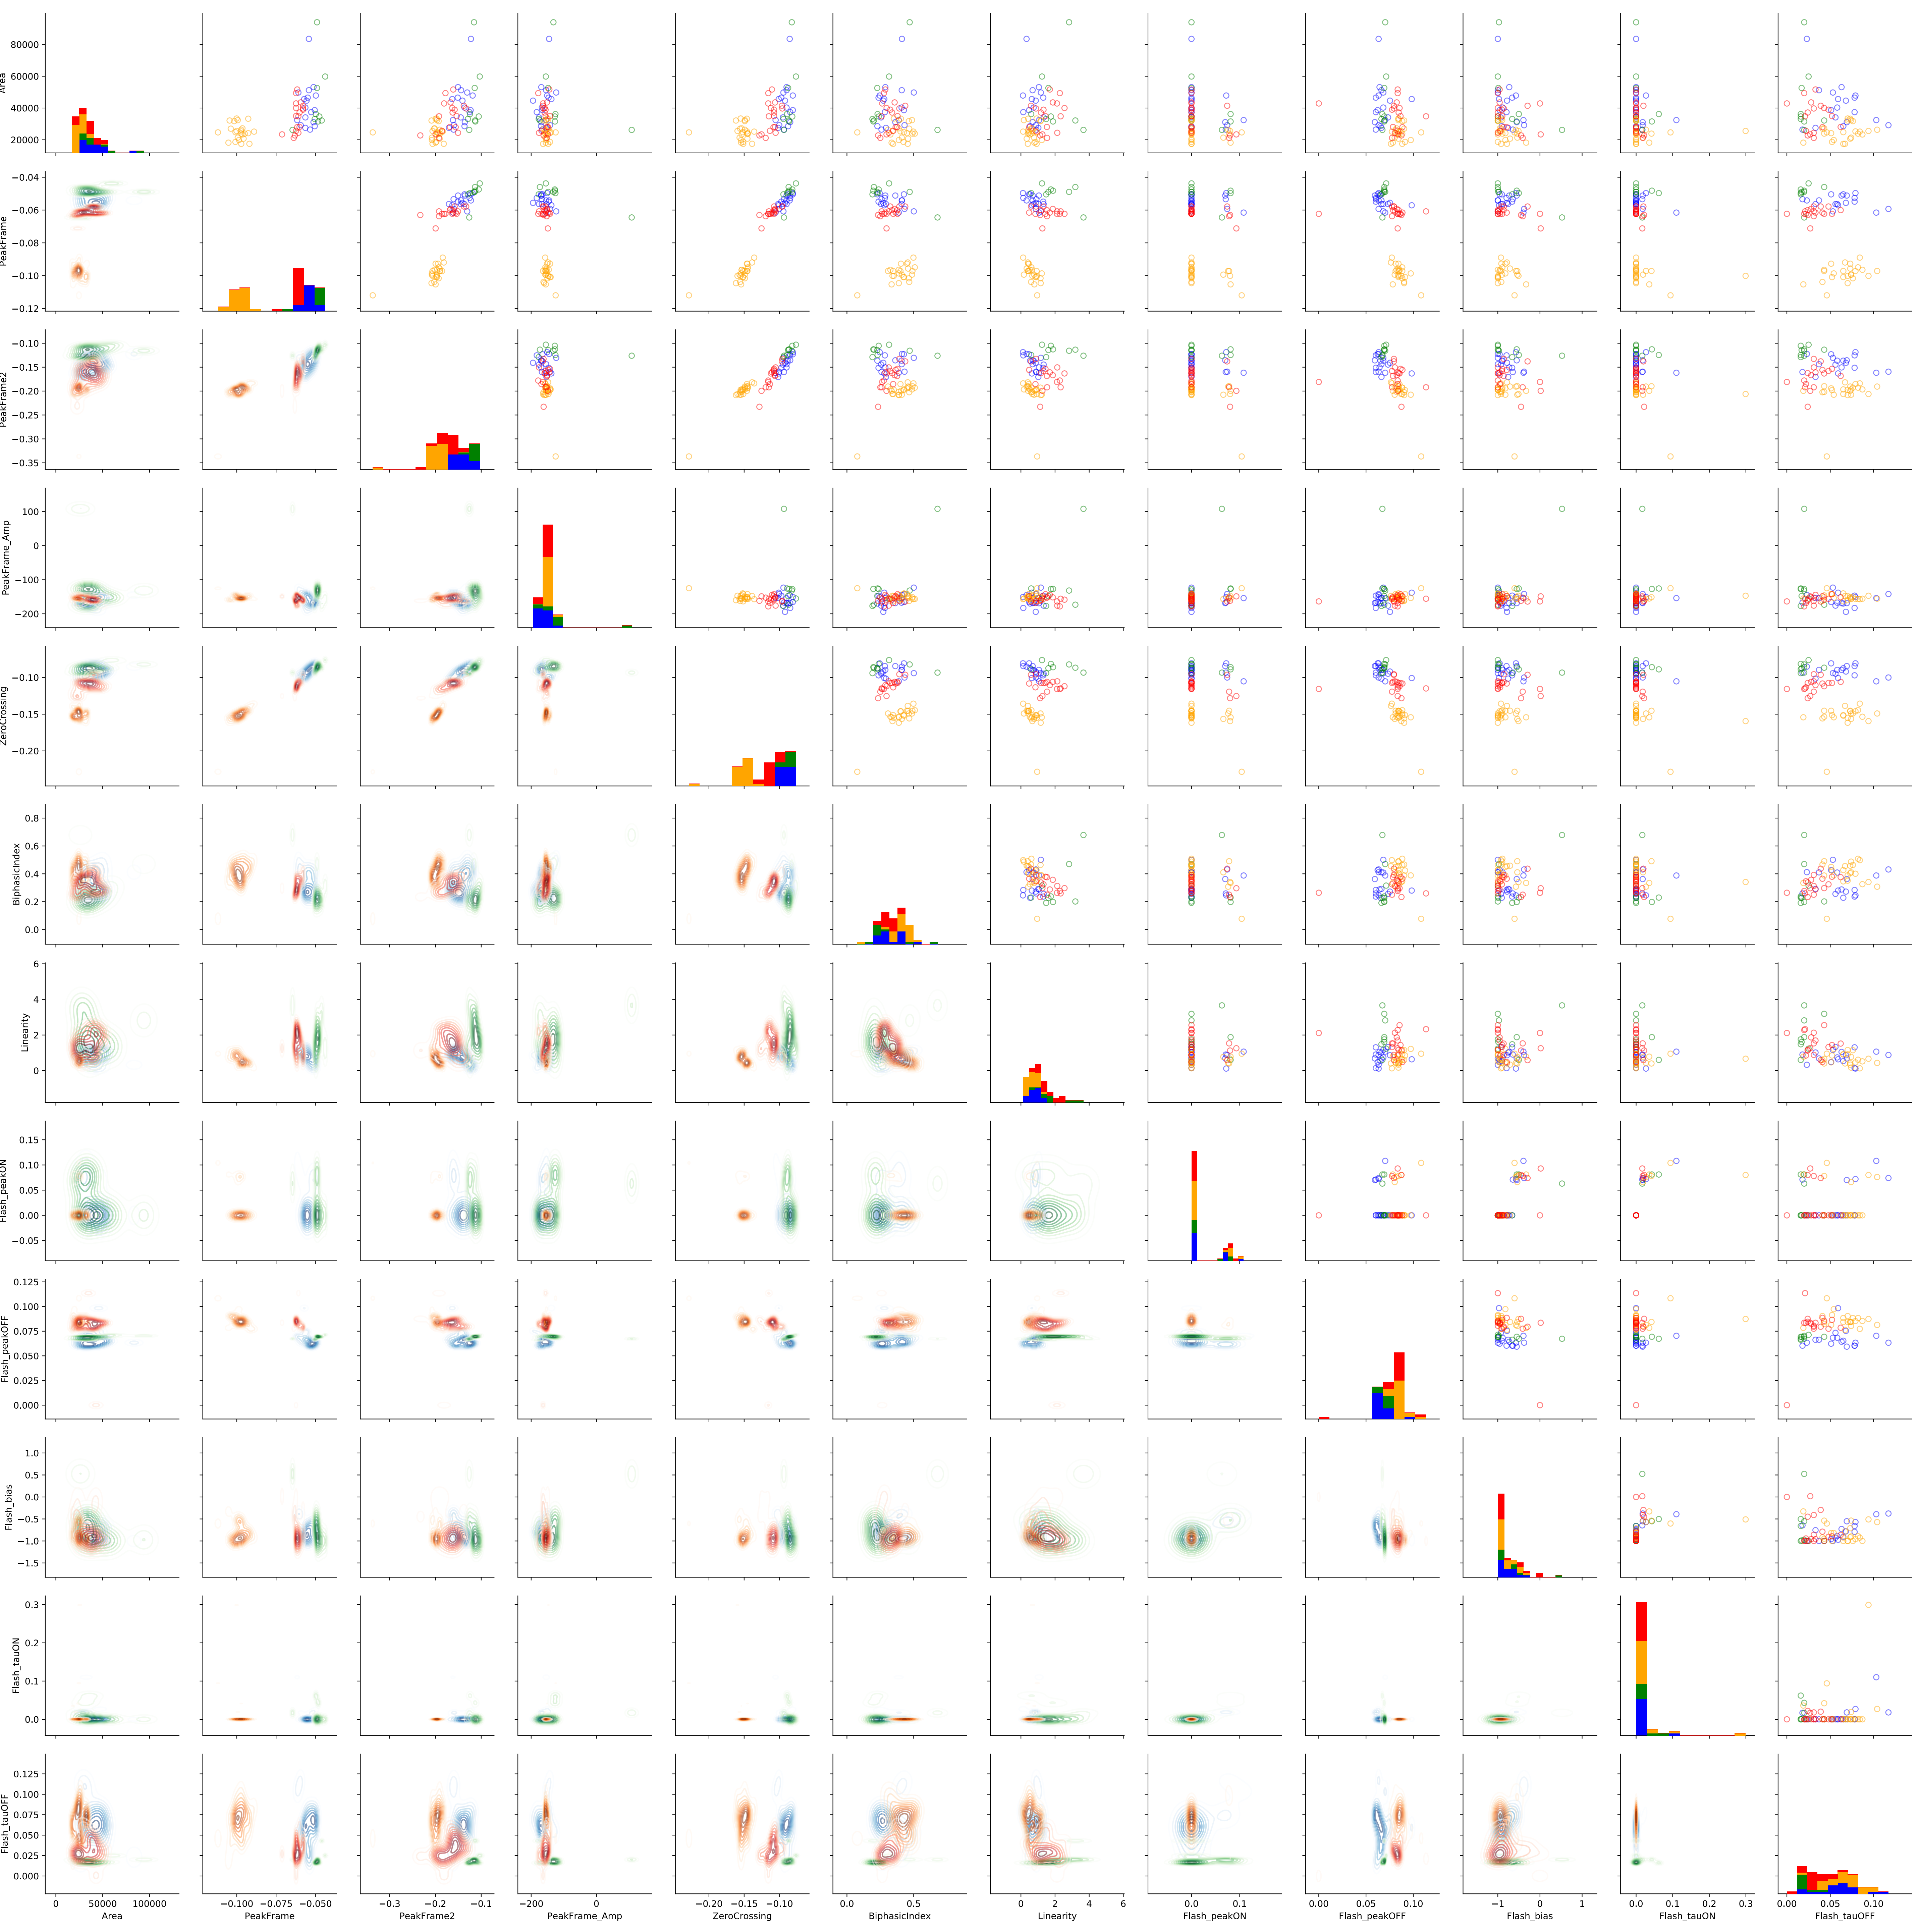

Supplement: Image_1.pdf [file Image_1.pdf]
